# Supplementary material for: Major-Histocompatibility-Complex Class I Alleles and Antigens in Hematopoietic-Cell Transplantation
Source: Atypon-hosted journal article supplement (doi:10.1056/nejmoa011826), 2001-12-20
Supplement: supplementary_app_1.pdf [file supplementary_app_1.pdf]

## Supplementary Appendix

This appendix has been provided by the authors to give readers additional information about their work.

Supplement to: Petersdorf EW, Hansen JA, Martin PJ, et al. Major-Histocompatibility-Complex Class I Alleles and Antigen in Hematopoietic-Cell Transplantation. *N Engl J Med* 2001;345:1794-800.
